# Supplementary material for: One-pot cellulose etherification and self-crosslinking via a mild hydroxyl–yne click reaction in a homogeneous system
Source: Royal Society of Chemistry journal article supplement (doi:10.1039/d2gc04278a), 2023-01-01
Supplement: d2gc04278a1.pdf [file d2gc04278a1.pdf]

## Supporting information:

### One-pot cellulose etherification and self-crosslinking via mild hydroxyl-yne click reaction in homogeneous system

Bowen Li,<sup>a</sup> Chaoqun Xu,<sup>a</sup> Juan Yu,<sup>\*a</sup> Liang Liu,<sup>a</sup> Xiaofang Zhang,<sup>\*b</sup> Yimin Fan<sup>\*a</sup>

<sup>a</sup> Jiangsu Co-Innovation Center of Efficient Processing and Utilization of Forest Resources, Jiangsu Key Lab of Biomass-Based Green Fuel and Chemicals, Key Laboratory of Forestry Genetics and Biotechnology of Ministry of Education, College of Chemical Engineering, Nanjing Forestry University, Longpan Road 159, Nanjing 210037, China. E-mail: yujuannjfu@njfu.edu.cn, fanyimin@njfu.edu.cn

<sup>b</sup> State Key Laboratory of New Textile Materials and Advanced Processing Technologies, Wuhan Textile University, Wuhan 430200, China. E-mail: xfzhang@wtu.edu.cn

#### Preparation of cellulose cinnamate

From the similarity of the chemical structure, cellulose cinnamate (CCi) containing alkene bonds, unsaturated bonds and benzene rings, was also prepared. The viscosity of the reaction mixture and the solubility of CCi were further investigated. Cellulose cinnamate was synthesized by the acylation of cellulose under AmimCl homogeneous condition using DMAP as catalyst. The dried cellulose was added to a certain amount of AmimCl (5 g) and 3mL DMF, and heated in oil bath for 30 min at 80 °C with mechanical stirring. The clear and viscous cellulose/ solution obtained was allowed to cool to room temperature. 0.1028 g (0.617 mmol) of cinnamate chloride and 0.075 g (0.0617 mmol) of DMAP were added to clear and viscous cellulose (0.1 g, 0.617 mmol) /AmimCl solution. The mixture was stirring for 4 h under 60 °C and subsequently precipitated in 200 ml of methanol. The pure product of CCi was dried in vacuum.

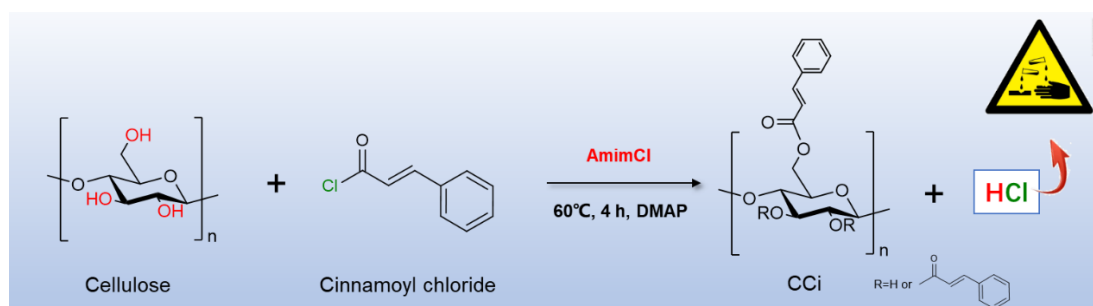

Scheme S1 Synthesis of cellulose cinnamate (CCi)

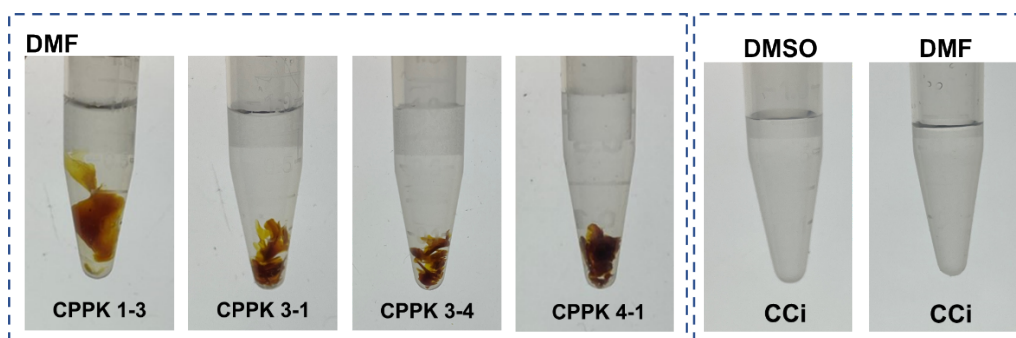

Figure S1. Solubility of the CPPKs and CCI sample

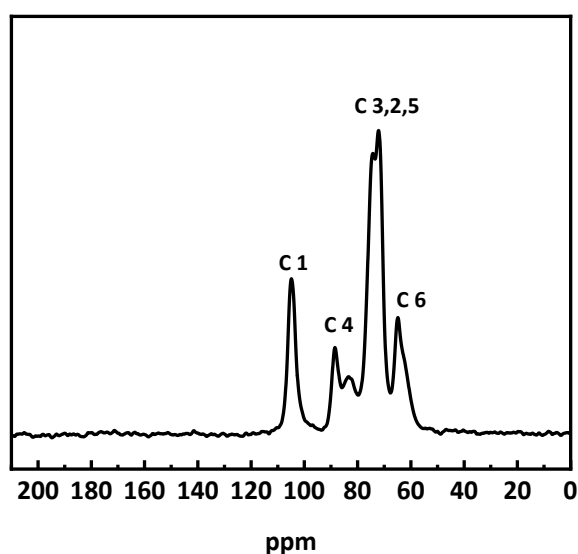

Figure S2.  $^{13}\text{C}$  NMR spectra of cellulose

### The XRD of cellulose, regenerated cellulose (re-cellulose) and CPPK3-1

The change in the crystalline structure of cellulose during dissolution and click reaction was studied using X-ray diffraction (XRD). The native crystalline structure of cellulose is cellulose I. Obviously, a typical pattern of Cellulose I was observed for raw cellulose with the main peaks at  $14.7^\circ$ ,  $16.4^\circ$ ,  $20.6^\circ$ ,  $22.7^\circ$ , and  $34.1^\circ$ . In this work, after dissolution-modification-regeneration, cellulose I transforms into a more stable cellulose II phase (Re-cellulose and CPPK), as indicated by the typical diffraction peaks observed at  $2\theta = 12.1^\circ$ ,  $20.0^\circ$ , respectively. (Figure S3).

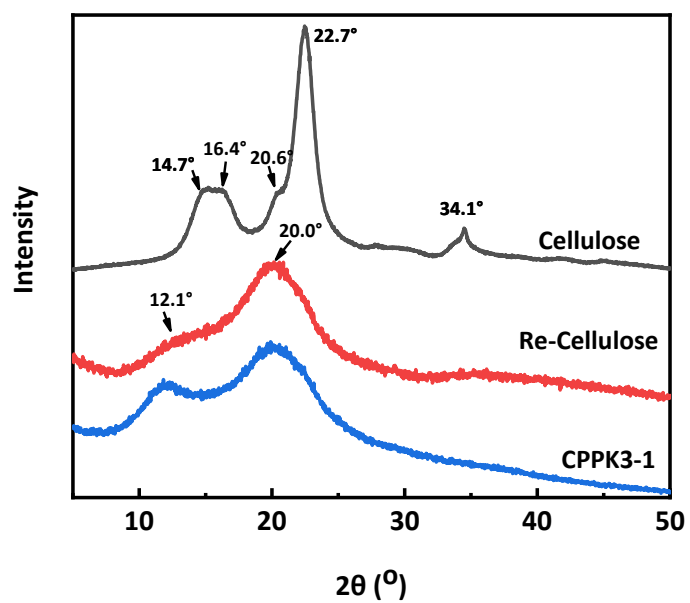

Figure S3. XRD patterns of cellulose, regenerated cellulose (re-cellulose) and CPPK3-1

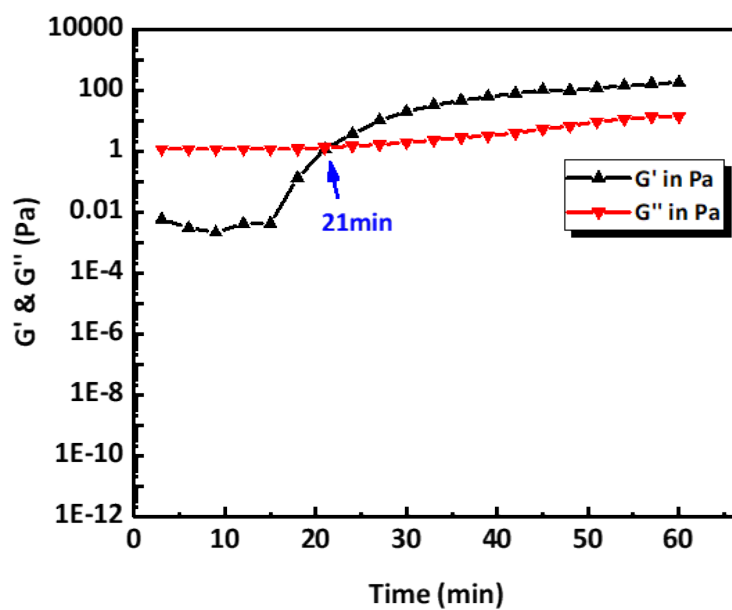

Figure S4.  $G'$  and  $G''$  of the CPPK 1-3 solutions on time with a frequency of 1Hz

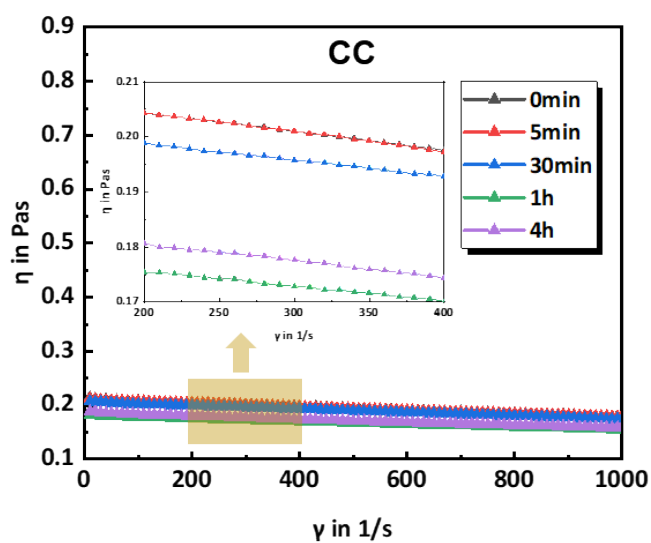

Figure S5. Viscosity of different reaction time of cellulose cinnamate (CC)

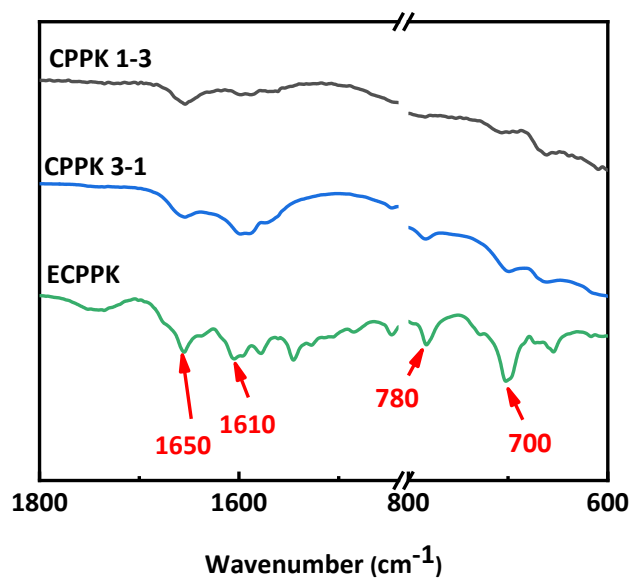

Figure S6. FTIR spectra of CPPK1-3, CPPK 3-1 and ECPPK

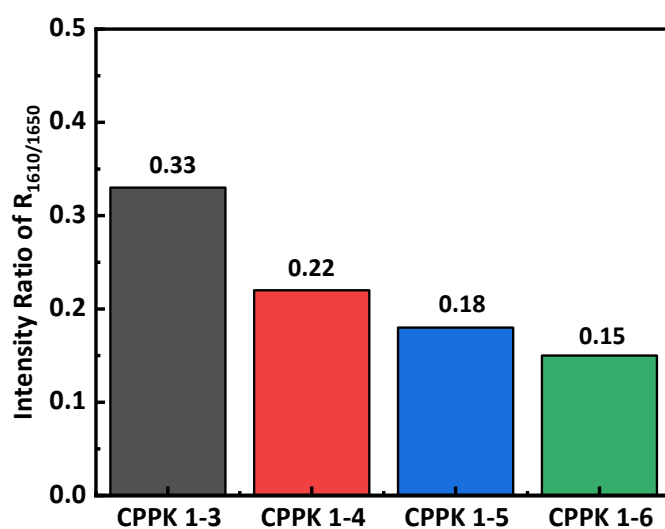

Figure S7. The intensity ratio of CPPK with different reaction temperature.

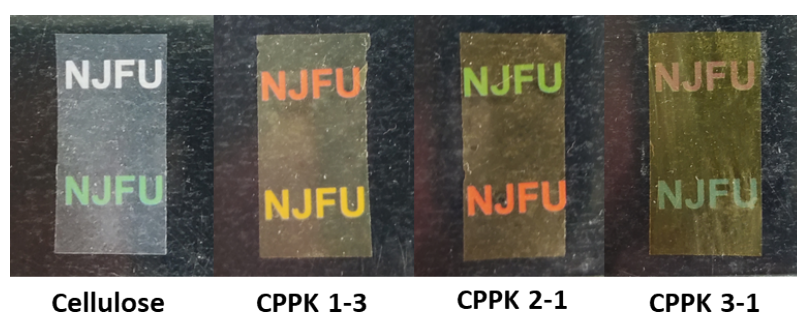

Figure S8. The photographs of films of cellulose and CPPKs

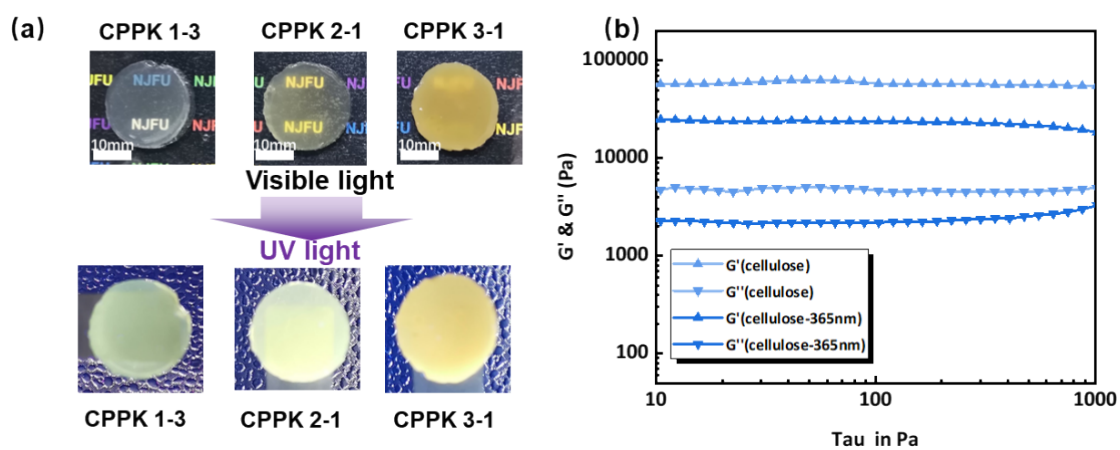

Figure S9. (a) The photographs of CPPK hydrogel before and after UV irradiation. (b) Viscoelastic diagram of cellulose hydrogel before and after UV irradiation.

Table S1. Comparison in the hydroxyl-yne click reaction applied in this work with other chemical reactions applied to cellulose materials.

| Entry | Products                                                                            | Derivatization reagents                          | Temperature (°C) | molar ratio of AGU/Derivatization reagents | Time   | Byproducts | Stress (MPa)  | Ref.      |
|-------|-------------------------------------------------------------------------------------|--------------------------------------------------|------------------|--------------------------------------------|--------|------------|---------------|-----------|
| 1     | amino cellulose (AC)                                                                | ethanediamine                                    | 100              | 1:25                                       | 6 h    | HCl        | 8.93          | 1         |
| 2     | stearoylated and cinnamoylated cellulose esters (SCC)                               | stearoyl chloride<br>cinnamoyl chloride          | 100              | 1:6.7                                      | 5 h    | HCl        | 25            | 2         |
| 3     | microcrystalline cellulose nitrilotriacetic acid esters (MCN)                       | nitrilotriacetic acid anhydride                  | 75               | 1:0.66                                     | 12 h   | -          | 58.46         | 3         |
| 4     | cellulose acetate (CA)                                                              | acetic anhydride                                 | 110              | 1:5                                        | 2 h    | -          | 59.5          | 4         |
| 5     | 3-pentadecylphenoxy acetic acid/acetic anhydride mixed cellulose esters (PA/Ac MCE) | 3-pentadecylphenoxy acetic acid/acetic anhydride | 100              | 1:6                                        | 6 h    | -          | 84            | 5         |
| 6     | aliphatic stearoyl/acetic anhydride mixed cellulose esters (St/Ac MCE)              | aliphatic stearoyl/acetic anhydride              | 100              | 1:6                                        | 6 h    | -          | 85            | 5         |
| 7     | cellulose-lignin (CL)                                                               | lignin                                           | 50               | -                                          | 12 h   | -          | 90            | 6         |
| 8     | cellulose cinnamate (CCi)                                                           | cinnamoyl chloride                               | 60               | 1:2.33                                     | 3 h    | HCl        | 92.4          | 7         |
| 9     | stearoylated and cinnamoylated cellulose esters under UV irradiation (SCC-UV)       | stearoyl chloride<br>cinnamoyl chloride          | 100              | 1:6.7                                      | 5 h    | HCl        | 60            | 2         |
| 10    | crosslinked regenerated cellulose (CRC)                                             | glutaric dialdehyde                              | 60               | -                                          | 20 min | -          | 76.8          | 8         |
| 11    | anisotropic cellulose films (ACF)                                                   | epichlorohydrin                                  | 0                | 1:1.33                                     | 2 h    | HCl        | 81.8          | 9         |
| 12    | lauroylated and cinnamoylated cellulose esters under UV irradiation (LCC-UV)        | lauroyl chloride<br>cinnamoyl chloride           | 100              | 1:7.6                                      | 5 h    | HCl        | 90            | 2         |
| 13    | CPPK                                                                                | PPK                                              | 25               | 1:2                                        | 4 h    | -          | 85.7<br>± 1.5 | This work |
|       | CPPK UV                                                                             |                                                  |                  | 1:1                                        |        |            | 88.8<br>± 1.7 |           |

1. Y. J. Hu, Y. Wang, Y. H. Huang, J. Bian, M. F. Li, F. Peng and R. C. Sun, *Carbohydr Polym*, 2019, **222**, 115008.
2. S. Rühlicke and K. Zhang, *Materials Today Communications*, 2020, **24**, 101015.
3. C. Shi, F. Tao and Y. Cui, *Int J Biol Macromol*, 2018, **114**, 400-407.
4. C. Yan, Z. Jun, H. Jiasong, L. Huiquan and Z. Yi, *Chinese Journal of Chemical Engineering*, 2010, **18**, 515-522.
5. S. Tanaka, T. Iwata and M. Iji, *ACS Sustainable Chemistry & Engineering*, 2017, **5**, 1485-1493.
6. H. Sadeghifar, R. Venditti, J. Jur, R. E. Gorga and J. J. Pawlak, *ACS Sustainable Chemistry & Engineering*, 2016, **5**, 625-631.
7. J. Wang, L. Emmerich, J. Wu, P. Vana and K. Zhang, *Nature Sustainability*, 2021, **4**, 877-883.
8. M. H. Gao, X. Xie, T. Huang, N. Zhang and Y. Wang, *Cellulose*, 2022, **29**, 8177-8194.
9. D. Ye, X. Lei, T. Li, Q. Cheng, C. Chang, L. Hu and L. Zhang, *ACS Nano*, 2019, **13**, 4843-4853.
